# Supplementary material for: Liraglutide restores chronic ER stress, autophagy impairments and apoptotic signalling in SH-SY5Y cells
Source: PubMed Central journal article supplement (PMC5700973; doi:10.1038/s41598-017-16488-x), 2017-11-23
Supplement: 41598_2017_16488_MOESM1_ESM.pdf [file 41598_2017_16488_MOESM1_ESM.pdf]

# Liraglutide restores chronic ER stress, autophagy impairments and apoptotic signalling in SH-SY5Y cells

Theodora Panagaki<sup>1</sup>, Maria Michael<sup>1</sup>, and Christian Hölscher<sup>1,\*</sup>

<sup>1</sup>Biomedical & Life Sciences Division, Lancaster University, Lancaster, LA1 4YG, UK

\*c.holscher@lancaster.ac.uk

## Supplementary Information

| Target                      | Modification Site | Mean $\pm$ SEM    |                   |                   |                   | One-way ANOVA    |               |
|-----------------------------|-------------------|-------------------|-------------------|-------------------|-------------------|------------------|---------------|
|                             |                   | CNTRL             | LIRA              | TG                | TG + LIRA         | <i>F</i>         | <i>p</i>      |
| Stat1                       | Tyr 701           | 1.00 $\pm$ 0.178  | 1.36 $\pm$ 0.106  | 1.02 $\pm$ 0.162  | 1.38 $\pm$ 0.194  | (3, 28) = 1.619  | 0.2072        |
| Akt                         | Ser 4731          | 1.00 $\pm$ 0.214  | 1.42 $\pm$ 0.241  | 0.867 $\pm$ 0.151 | 1.23 $\pm$ 0.160  | (3, 28) = 1.575  | 0.2174        |
| AMPK $\alpha$               | Thr 172           | 1.00 $\pm$ 0.201  | 0.962 $\pm$ 0.191 | 0.666 $\pm$ 0.056 | 0.619 $\pm$ 0.052 | (3, 28) = 1.870  | 0.1575        |
| S6 Ribosomal Protein Kinase | Ser 235/<br>236   | 1.00 $\pm$ 0.1664 | 0.813 $\pm$ 0.095 | 0.733 $\pm$ 0.096 | 0.958 $\pm$ 0.076 | (3, 28) = 1.203  | 0.3268        |
| mTOR                        | Ser 2448          | 1.00 $\pm$ 0.107  | 1.02 $\pm$ 0.122  | 0.70 $\pm$ 0.103  | 1.15 $\pm$ 0.190  | (3, 27) = 2.018  | 0.1351        |
| HSP27                       | Ser 78            | 1.00 $\pm$ 0.241  | 0.970 $\pm$ 0.145 | 0.609 $\pm$ 0.082 | 0.635 $\pm$ 0.128 | (3, 28) = 1.727  | 0.1841        |
| p70 S6K                     | Thr 389           | 1.00 $\pm$ 0.103  | 0.863 $\pm$ 0.062 | 0.930 $\pm$ 0.122 | 0.807 $\pm$ 0.115 | (3, 28) = 0.6552 | 0.5864        |
| PRAS40                      | Thr 246           | 1.00 $\pm$ 0.176  | 0.925 $\pm$ 0.138 | 0.712 $\pm$ 0.077 | 0.798 $\pm$ 0.102 | (3, 28) = 0.9936 | 0.4102        |
| p38                         | Thr 180/Tyr 182   | 1.00 $\pm$ 0.212  | 1.03 $\pm$ 0.227  | 0.662 $\pm$ 0.140 | 1.16 $\pm$ 0.165  | (3, 28) = 1.261  | 0.3068        |
| SAPK/JNK                    | Thr 183/Tyr 185   | 1.00 $\pm$ 0.183  | 1.03 $\pm$ 0.164  | 0.89 $\pm$ 0.078  | 0.87 $\pm$ 0.111  | (3, 28) = 0.3143 | 0.8149        |
| <b>Caspase 3</b>            | Asp 175           | 1.00 $\pm$ 0.0782 | 0.98 $\pm$ 0.119  | 1.35 $\pm$ 0.149  | 1.06 $\pm$ 0.047  | (3, 28) = 2.561  | <b>0.0750</b> |

Table S1: **Protein expression of additional signalling targets included in the PathScan<sup>®</sup> Intracellular Signaling Array kit.** Twenty-four hours post seeding, SH-SY5Y cells were serum starved for 8 h and treated with 0 or 100 nM of thapsigargin (TG) for 16 h, in the presence or absence of 100 nM Liraglutide (LIRA). Cells were harvested, and 0.3 mg mL<sup>-1</sup> protein of whole-cell lysate was processed with the PathScan<sup>®</sup> sandwich immunoassay. All samples per experiment were processed in duplicate. Data is expressed as fold change to the control (CNTRL; unstressed/untreated conditions) from four independent experiments.

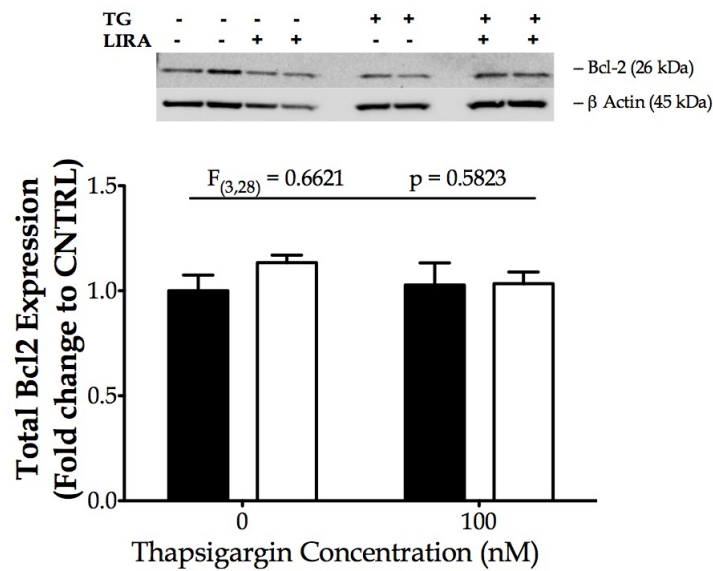

Figure S1: **Chronic disturbance of ER calcium homeostasis does not affect the expression levels of the pro-survival Bcl-2 protein.** Twenty-four hours post seeding, SH-SY5Y cells were serum starved for 8 h and treated with 0 or 100 nM of thapsigargin for 16 h, in the presence or absence of 100 nM Liraglutide. Cells were harvested, and Bcl-2 expression was determined by western blotting.  $\beta$ -Actin was used as the loading control to the western blot analysis. Each bar represents mean  $\pm$  SEM from four independent experiments. Data is expressed as fold change to the control (CNTRL; unstressed/untreated conditions). Data was analysed by one- and two-way ANOVA, followed by *post hoc* Bonferroni's multiple comparison t-test.
